# Supplementary material for: Disparities by Race and Urbanicity in Online Health Care Facility Reviews
Source: PubMed Central journal article supplement (PMC11584935; doi:10.1001/jamanetworkopen.2024.46890), 2024-11-22
Supplement: jamanetwopen-e2446890-s001.pdf [file jamanetwopen-e2446890-s001.pdf]

## Supplementary Online Content

Sehgal NKR, Agarwal AK, Southwick L, et al. Disparities by race and urbanicity in online health care facility reviews. *JAMA Netw Open*. 2024;7(11):e2446890. doi:10.1001/jamanetworkopen.2024.46890

**eFigure 1.** Distribution of Platform Health Facility Ratings, 2014-2023

**eTable 1.** Median Number of Reviews by Facility Type

**eFigure 2.** Difference in Mean Platform Health Facility Positive Rating Pre/Post March 2020

**eFigure 3.** Interrupted Time Series (ITS) Analysis of Positive Reviews Pre- and Post-COVID-19

**eTable 2.** Interrupted Time Series (ITS) Analysis of Positive Reviews Pre- and Post-COVID-19: Coefficients and 95% Confidence Intervals for Changes in Review Positivity by Facility Type, Racial/Ethnic Composition, and Urban/Rural Settings

**eTable 3.** Multivariate Relationship Between Platform Health Facility Rating Positivity and Facility Characteristics and Time

**eTable 4.** Topic Coherence and Uniqueness Scores by Model

**eTable 5.** Themes Associated With Platform Health Facility Reviews

**eFigure 4.** Change in Theme Prevalence Over Time Among Positive Reviews

This supplementary material has been provided by the authors to give readers additional information about their work.

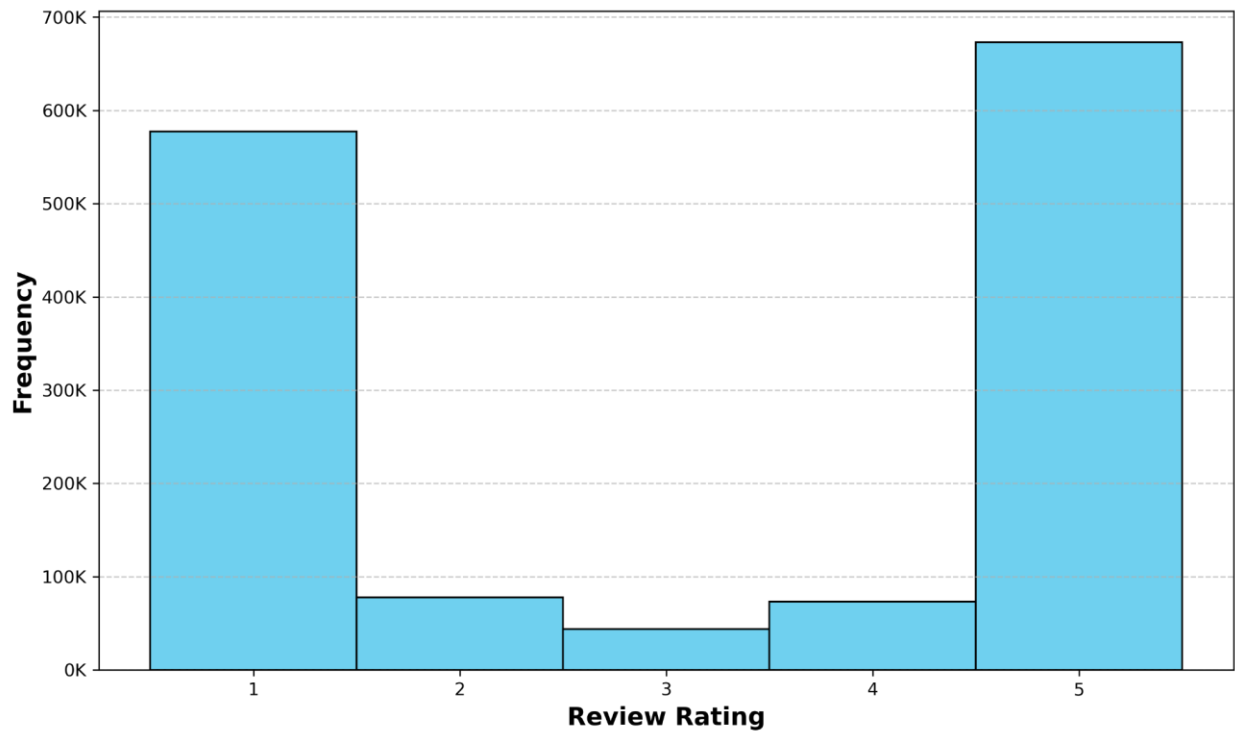

**eFigure 1. Distribution of Platform Health Facility Ratings, 2014-2023**

| Facility Type                | Median (IQR)<br>Number of Reviews |
|------------------------------|-----------------------------------|
| Urgent Care                  | 66 (116)                          |
| Medical Centers              | 55 (113)                          |
| Physical Therapy             | 21 (45)                           |
| Pharmacy                     | 28 (48)                           |
| Hospitals                    | 93 (180)                          |
| Physicians                   | 12 (45)                           |
| Counseling & Mental Health   | 10 (26)                           |
| Rehabilitation Center        | 17 (33)                           |
| Emergency Rooms              | 110 (195)                         |
| Occupational Therapy         | 20 (39)                           |
| Home Health Care             | 11 (39)                           |
| Skilled Nursing              | 20 (33)                           |
| Ultrasound Imaging Centers   | 73 (177)                          |
| Lactation Services           | 39 (72)                           |
| Prenatal                     | 41 (85)                           |
| Speech Therapists            | 13 (24)                           |
| Diagnostic Services          | 45 (115)                          |
| Reproductive Health Services | 65 (127)                          |
| Nurse Practitioner           | 18 (56)                           |
| Dialysis Clinics             | 2 (5)                             |

**eTable 1. Median Number of Reviews by Facility Type**

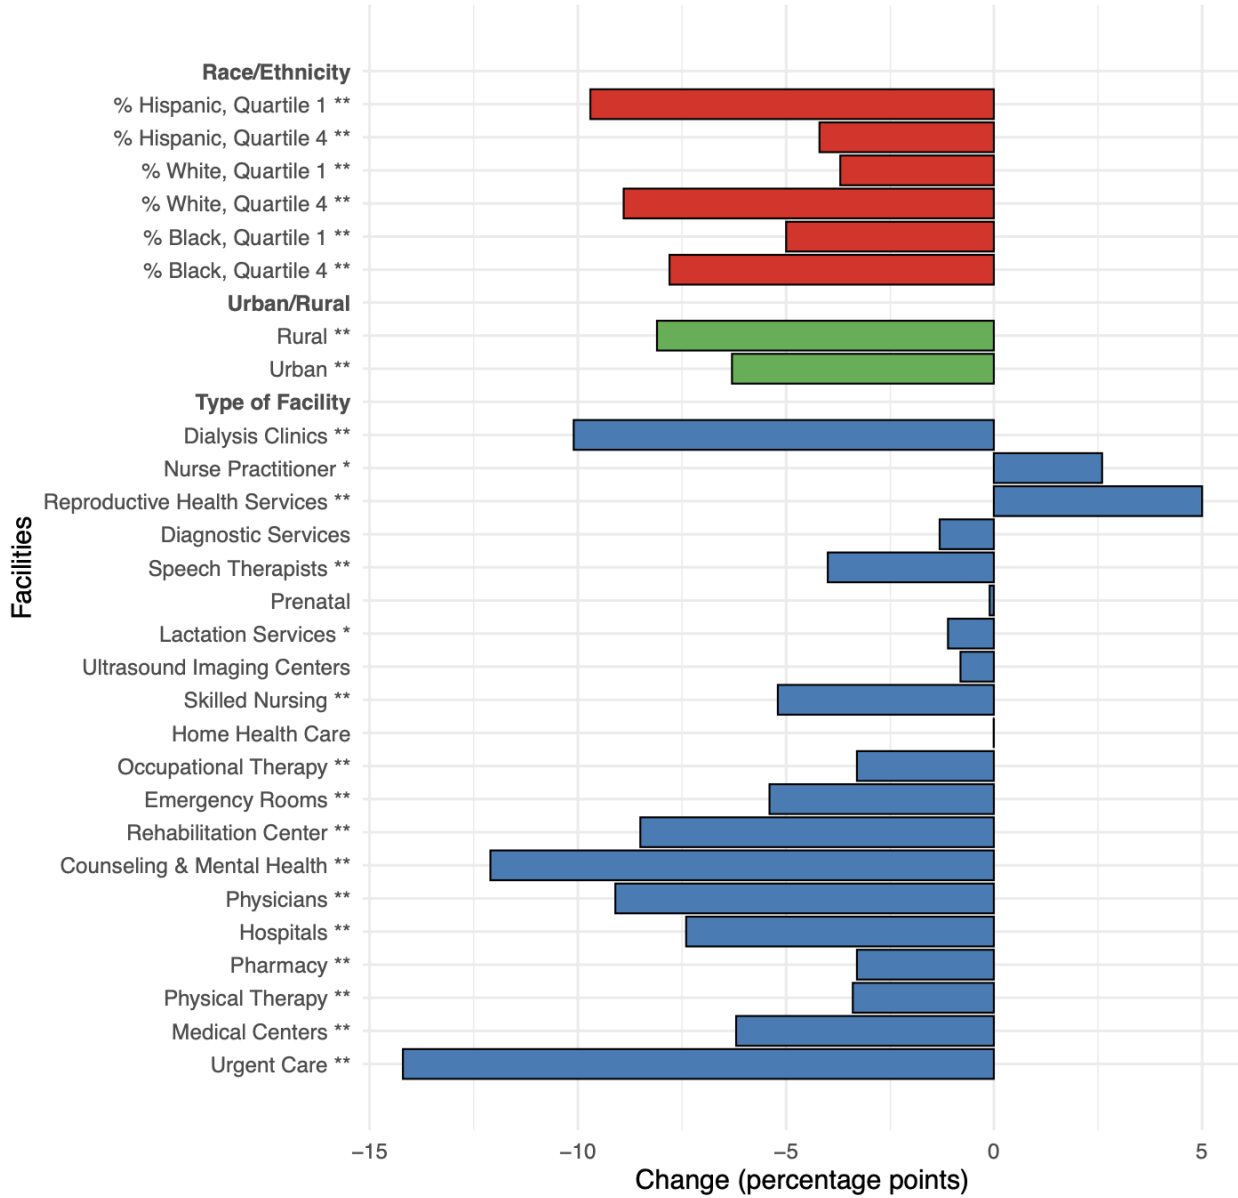

**eFigure 2. Difference in Mean Platform Health Facility Positive Rating Pre/Post March 2020**

Bars marked with \* indicate  $P < 0.05$ , and \*\* indicate  $P < 0.001$

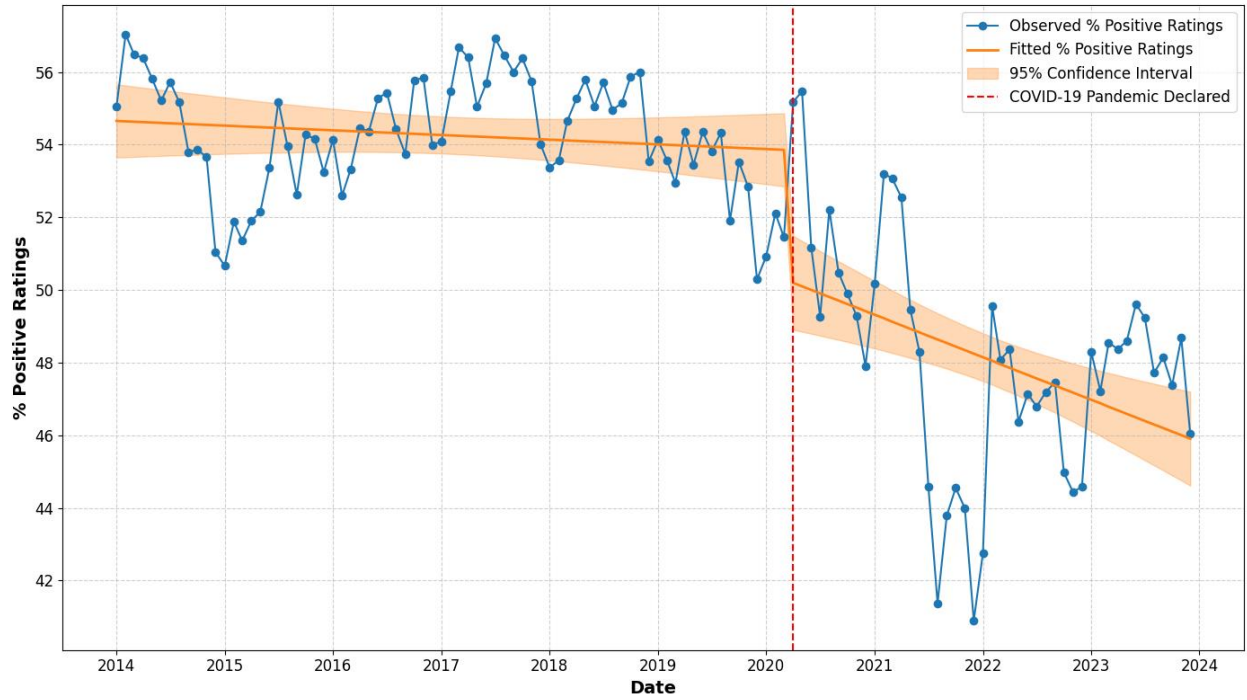

**eFigure 3. Interrupted Time Series (ITS) Analysis of Positive Reviews Pre- and Post-COVID-19**

| Group                        | Post-Covid Level Change (95% CI) | Post-Covid Trend Change (95% CI) |
|------------------------------|----------------------------------|----------------------------------|
| Overall                      | 0.030<br>(-0.022, 0.081)         | -0.001**<br>(-0.001, -0.000)     |
| <b>Facility Type</b>         |                                  |                                  |
| Urgent Care                  | -0.144*<br>(-0.264, -0.023)      | 0.000<br>(-0.004, 0.004)         |
| Medical Centers              | -0.013<br>(-0.085, 0.058)        | -0.001<br>(-0.003, 0.002)        |
| Physical Therapy             | 0.105***<br>(0.060, 0.149)       | -0.004***<br>(-0.006, -0.003)    |
| Pharmacy                     | 0.115*<br>(0.013, 0.216)         | -0.004*<br>(-0.008, -0.001)      |
| Hospitals                    | -0.029<br>(-0.091, 0.033)        | -0.000<br>(-0.002, 0.002)        |
| Physicians                   | -0.047<br>(-0.138, 0.044)        | -0.001<br>(-0.004, 0.002)        |
| Counseling & Mental Health   | 0.012<br>(-0.049, 0.073)         | -0.002<br>(-0.004, 0.000)        |
| Rehabilitation Center        | -0.015<br>(-0.082, 0.053)        | -0.001<br>(-0.004, 0.001)        |
| Emergency Rooms              | -0.074<br>(-0.188, 0.039)        | 0.000<br>(-0.004, 0.004)         |
| Occupational Therapy         | 0.020<br>(-0.077, 0.117)         | -0.003<br>(-0.006, 0.000)        |
| Home Health Care             | 0.276***<br>(0.163, 0.389)       | -0.011***<br>(-0.015, -0.007)    |
| Skilled Nursing              | -0.132<br>(-0.274, 0.010)        | 0.002<br>(-0.003, 0.007)         |
| Ultrasound Imaging Centers   | 0.256***<br>(0.164, 0.348)       | -0.009***<br>(-0.012, -0.006)    |
| Lactation Services           | 0.089**<br>(0.037, 0.141)        | -0.003**<br>(-0.005, -0.001)     |
| Prenatal                     | -0.011<br>(-0.076, 0.054)        | 0.000<br>(-0.002, 0.002)         |
| Speech Therapists            | 0.081<br>(-0.019, 0.180)         | -0.004*<br>(-0.007, -0.000)      |
| Diagnostic Services          | 0.117<br>(-0.026, 0.260)         | -0.005*<br>(-0.010, -0.000)      |
| Reproductive Health Services | -0.217**<br>(-0.352, -0.081)     | 0.007**<br>(0.002, 0.012)        |
| Nurse Practitioner           | 0.336***<br>(0.160, 0.511)       | -0.012***<br>(-0.018, -0.006)    |
| Dialysis Clinics             | -0.002<br>(-0.329, 0.325)        | 0.000<br>(-0.011, 0.011)         |
| <b>Urban/Rural</b>           |                                  |                                  |

|                   |                           |                              |
|-------------------|---------------------------|------------------------------|
| Rural             | -0.096<br>(-0.205, 0.014) | 0.002<br>(-0.002, 0.005)     |
| Urban             | 0.042<br>(-0.032, 0.117)  | -0.003*<br>(-0.006, -0.001)  |
| <b>% Black</b>    |                           |                              |
| Quartile 4        | 0.009<br>(-0.066, 0.084)  | -0.002<br>(-0.005, 0.000)    |
| Quartile 1        | 0.065<br>(-0.009, 0.139)  | -0.003**<br>(-0.006, -0.001) |
| <b>% White</b>    |                           |                              |
| Quartile 4        | 0.008<br>(-0.074, 0.089)  | -0.002<br>(-0.005, 0.000)    |
| Quartile 1        | 0.043<br>(-0.024, 0.111)  | -0.003*<br>(-0.005, -0.000)  |
| <b>% Hispanic</b> |                           |                              |
| Quartile 4        | 0.040<br>(-0.037, 0.117)  | -0.003*<br>(-0.006, -0.000)  |
| Quartile 1        | -0.034<br>(-0.119, 0.050) | -0.001<br>(-0.004, 0.002)    |

**eTable 2. Interrupted Time Series (ITS) Analysis of Positive Reviews Pre- and Post-COVID-19: Coefficients and 95% Confidence Intervals for Changes in Review Positivity by Facility Type, Racial/Ethnic Composition, and Urban/Rural Settings.**

| <b>Characteristic</b>        | <b>Odds Ratio (95% confidence interval)</b> |
|------------------------------|---------------------------------------------|
| Post-COVID                   | 0.73 (0.66, 0.81)                           |
| <b>Facility Type</b>         |                                             |
| Urgent Care                  | 0.82 (0.81, 0.83)                           |
| Medical Centers              | 0.55 (0.55, 0.56)                           |
| Physical Therapy             | 2.75 (2.71, 2.79)                           |
| Pharmacy                     | 0.44 (0.43, 0.44)                           |
| Hospitals                    | 0.44 (0.43, 0.44)                           |
| Physicians                   | 0.65 (0.64, 0.66)                           |
| Counseling & Mental Health   | 1.15 (1.13, 1.17)                           |
| Rehabilitation Center        | 0.81 (0.8, 0.83)                            |
| Emergency Rooms              | 1.05 (1.03, 1.07)                           |
| Occupational Therapy         | 0.55 (0.53, 0.56)                           |
| Home Health Care             | 0.86 (0.84, 0.88)                           |
| Skilled Nursing              | 0.57 (0.55, 0.58)                           |
| Ultrasound Imaging Centers   | 1.87 (1.81, 1.92)                           |
| Lactation Services           | 6.52 (6.21, 6.84)                           |
| Prenatal                     | 2.54 (2.45, 2.64)                           |
| Speech Therapists            | 1.79 (1.72, 1.85)                           |
| Diagnostic Services          | 0.84 (0.82, 0.87)                           |
| Reproductive Health Services | 1.96 (1.89, 2.03)                           |
| Nurse Practitioner           | 1.87 (1.77, 1.97)                           |
| Dialysis Clinics             | 0.73 (0.66, 0.81)                           |
| <b>Urban/Rural</b>           |                                             |
| Rural                        | 0.95 (0.93, 0.97)                           |
| Urban                        | --                                          |
| <b>% Black</b>               |                                             |
| Quartile 4                   | 0.58 (0.57, 0.59)                           |



|                   |                   |
|-------------------|-------------------|
| Quartile 2-3      | 0.83 (0.82, 0.84) |
| Quartile 1        | --                |
| <b>% White</b>    |                   |
| Quartile 4        | 0.75 (0.74, 0.76) |
| Quartile 2-3      | 0.93 (0.93, 0.94) |
| Quartile 1        | --                |
| <b>% Hispanic</b> |                   |
| Quartile 4        | 1.05 (1.03, 1.06) |
| Quartile 2-3      | 1.15 (1.13, 1.16) |
| Quartile 1        | --                |

**eTable 3. Multivariate Relationship between Platform Health Facility Rating Positivity and Facility Characteristics and Time. Note: Each facility type is treated as a separate binary indicator variable as a facility can belong to multiple categories (e.g., Hospital and Emergency Room).**

| <b>Model</b> | <b>Number of Topics</b> | <b>Uniqueness</b> | <b>C<sub>UMass</sub></b> | <b>C<sub>v</sub></b> | <b>C<sub>UCI</sub></b> | <b>C<sub>NPMI</sub></b> |
|--------------|-------------------------|-------------------|--------------------------|----------------------|------------------------|-------------------------|
| LDA          | 200                     | 0.63              | -3.96                    | 0.62                 | 1.10                   | 0.11                    |
| LDA          | 500                     | 0.52              | -5.09                    | 0.58                 | 0.88                   | 0.10                    |
| LDA          | 1000                    | 0.45              | -6.06                    | 0.56                 | 0.69                   | 0.09                    |
| BERTopic     | 2000                    | 0.84              | -5.61                    | 0.46                 | -0.08                  | 0.05                    |

**eTable 4. Topic Coherence and Uniqueness Scores by Model**

| <b>Theme</b>                               | <b>Top 10 Words</b>                                                                           |
|--------------------------------------------|-----------------------------------------------------------------------------------------------|
| <b>Pharmacy</b>                            |                                                                                               |
| Pharmacy Services                          | clinic, pharmacy, years, ready, prescription, line, lady, pick, prescriptions, name           |
| Pharmacy and Prescription Services         | pharmacy, cvs, service, customer, store, prescription, pharmacist, prescriptions, call, ready |
| Medication and Prescription Management     | medication, facility, prescription, nursing, meds, body, refill, exercises, call, rehab       |
| Pharmacy Communication                     | stars, give, years, call, phone, star, pharmacy, minutes, cvs, hold                           |
| <b>Services</b>                            |                                                                                               |
| Pediatric Care                             | visit, kids, child, first, children, questions, store, cvs, treatment, explained              |
| Therapy                                    | life, our, us, thank, therapy, baby, pharmacy, health, physical, therapist                    |
| Communication and Insurance Handling       | call, phone, called, insurance, review, office , medical, questions, answer, calls            |
| Facility Cleanliness and Wait Time         | nice, store, room, it's, cvs, clean, really, wait, front, always                              |
| Family Medicine and Insurance              | family, therapy, facility, physical, him, mom, room, office , er, insurance                   |
| Family Member Treatment                    | son, him, surgery, our, us, mom, number, old, name, information                               |
| Emergency Room Services                    | er, room, waiting, emergency, hours, blood, nurses, nurse, him, test                          |
| Family Health Care                         | our, us, him, daughter, husband, baby, mom, family, call, mother                              |
| Physical Therapy and Injury Rehabilitation | therapy, physical, pt, therapist, surgery, knee, exercises, him, therapists, injury           |
| <b>Communication</b>                       |                                                                                               |
| Customer Service and Staff Behavior        | front, desk, rude, service, customer, him, ever, worst, unprofessional, room                  |
| Staff Friendliness and Professionalism     | recommend, urgent, front, nice, always, highly, helpful, desk, friendly, thank                |
| <b>Logistics</b>                           |                                                                                               |
| Wait Time                                  | minutes, wait, room, waiting, hour, hours, waited, er, than, 30                               |

|                               |                                                                                         |
|-------------------------------|-----------------------------------------------------------------------------------------|
| Billing and Insurance Charges | insurance, pay, bill, money, test , paid, billing, charge, charged, covid               |
| Insurance and Billing Issues  | insurance, billing, office , times, i've, bill, always, company, call, both             |
| Test Results and Wait Time    | him, i've, wait, ever, it's, test, results, office, else, waiting                       |
| Scheduling and Parking        | store, appointments, parking, scheduled, appt, schedule, surgery, results, cvs, minutes |

**eTable 5. Themes Associated with Platform Health Facility Reviews**

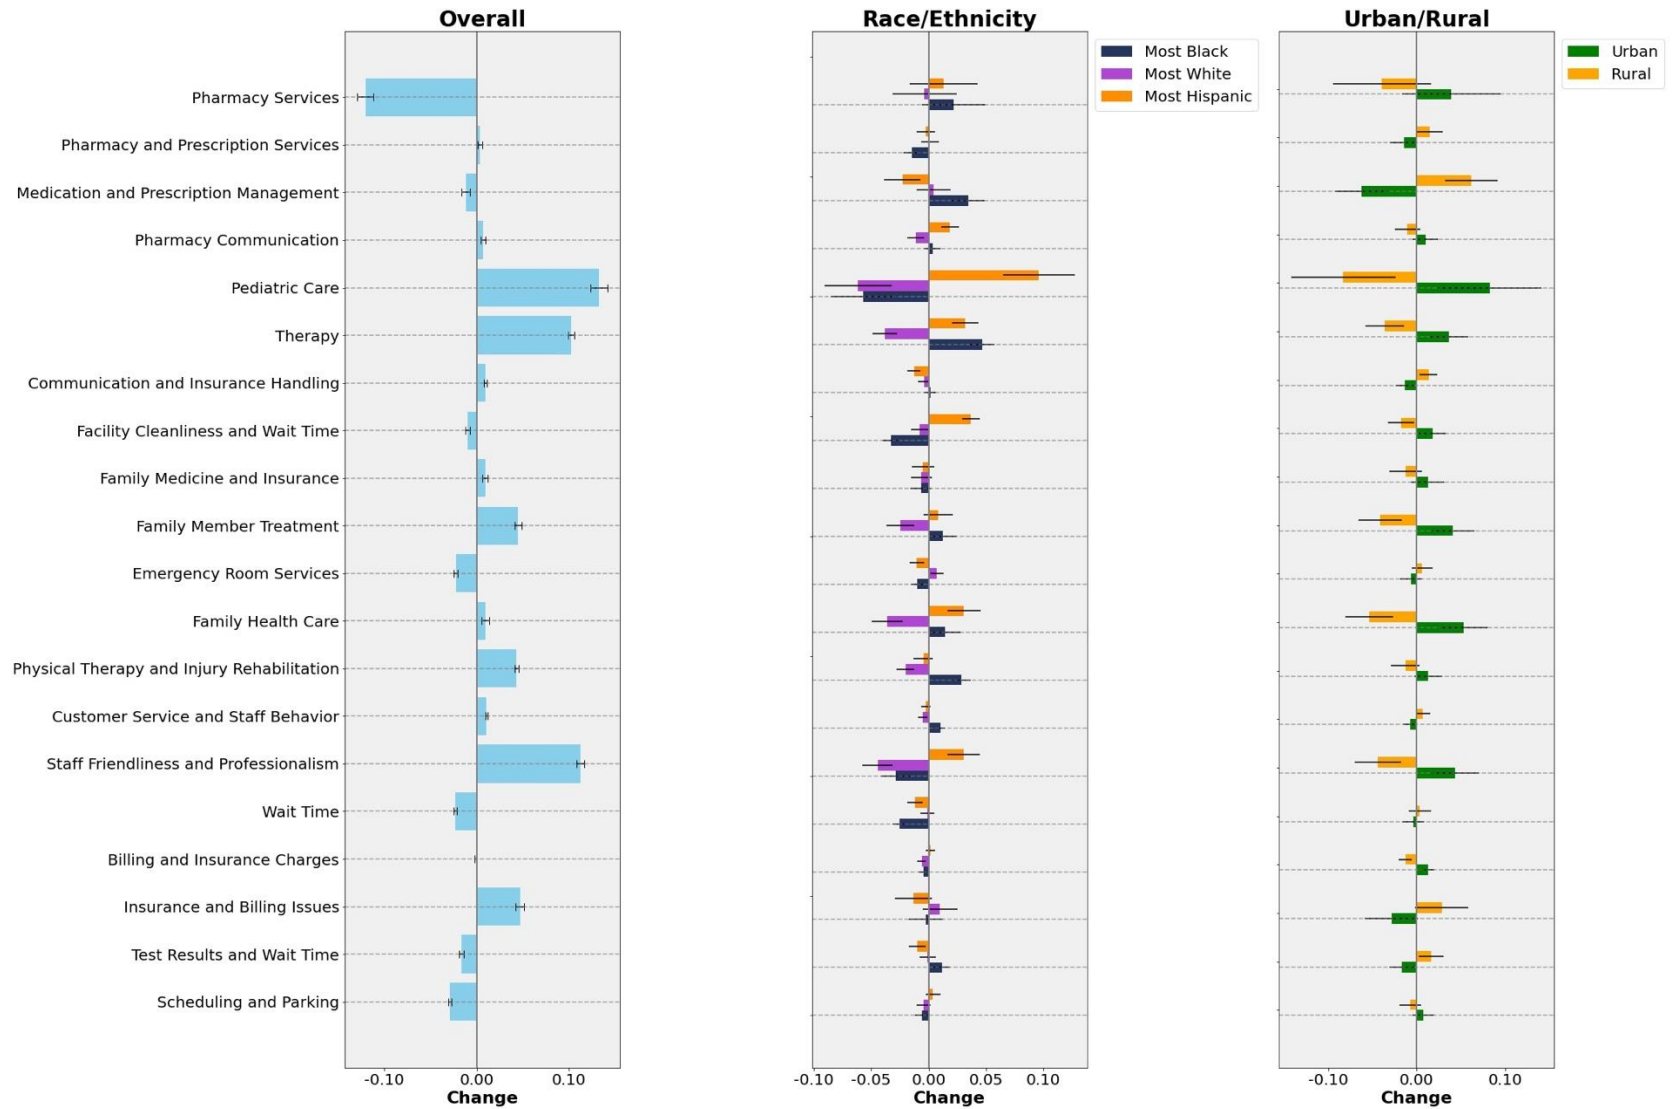

**eFigure 4. Change in Theme Prevalence Over Time Among Positive Reviews. Panel A) All Positive Reviews. Panel B) Race/Ethnicity Quartile 4 vs Quartile 1. Panel C) Urban vs Rural**
