# Supplementary material for: Disparities by Race and Urbanicity in Online Health Care Facility Reviews
Source: PubMed Central journal article supplement (PMC11584935; doi:10.1001/jamanetworkopen.2024.46890), 2024-11-22
Supplement: jamanetwopen-e2446890-s002.pdf [file jamanetwopen-e2446890-s002.pdf]

## Data Sharing Statement

Sehgal. Disparities by Race and Urbanicity in Online Health Care Facility Reviews. *JAMA Netw Open*. Published November 22, 2024. doi:10.1001/jamanetworkopen.2024.46890

### Data

**Data available:** No
